# Supplementary material for: Machine Learning–Based Discovery of a Gene Expression Signature in Pediatric Acute Respiratory Distress Syndrome
Source: PubMed Central journal article supplement — Crit Care Explor. 2021 Jun 15;3(6):e0431. doi: 10.1097/CCE.0000000000000431 (PMC8208445; doi:10.1097/cce.0000000000000431), 2021-06-15
Supplement: cc9-3-e0431-s001.pdf [file cc9-3-e0431-s001.pdf]

**Supplementary Table 1. Test Characteristics of Pediatric Acute Respiratory Distress Syndrome Model for the Neutrophil Reporter Assay Using Leave One Out Cross-validation, (n = 18, 9 PARDS)**

| Model<br>Variables        | XGBoost |             | Random Forest |             | SVM    |              |
|---------------------------|---------|-------------|---------------|-------------|--------|--------------|
|                           | Values  | 95% CI      | Values        | 95% CI      | Values | 95%CI        |
| True negatives            | 5       | –           | 5             | –           | 9      | –            |
| False positives           | 4       | –           | 4             | –           | 0      | –            |
| True positives            | 7       | –           | 7             | –           | 8      | –            |
| False negatives           | 2       | –           | 2             | –           | 1      | –            |
| Sensitivity               | 0.77    | 0.31 – 0.87 | 0.77          | 0.31 – 0.87 | 0.88   | 0.59 – 1.0   |
| Specificity               | 0.55    | 0.30 – 0.94 | 0.55          | 0.30 – 0.94 | 1      | 0.54 – 0.99  |
| Positive predictive value | 0.63    | 0.40 – 0.96 | 0.63          | 0.40 – 0.96 | 1      | 0.51 – 0.99  |
| Negative predictive value | 0.71    | 0.22 – 0.84 | 0.71          | 0.22 – 0.84 | 0.9    | 0.62 – 1.0   |
| Positive likelihood ratio | 1.75    | 0.63 – 7.8  | 1.75          | 0.63 – 7.8  | –      | 1.55 – 64.19 |
| Negative likelihood ratio | 0.39    | 0.20 – 1.24 | 0.39          | 0.2 – 1.24  | 0.11   | –            |
| Area under the ROC curve  | 0.73    | 0.48 – 0.92 | 0.77          | 0.48 – 0.92 | 0.89   | 0.7 – 1.0    |

ROC = receiver operating characteristic.

Dashes indicate variables that do not have 95% confidence intervals (CI).
