# Supplementary material for: Machine Learning–Based Discovery of a Gene Expression Signature in Pediatric Acute Respiratory Distress Syndrome
Source: PubMed Central journal article supplement — Crit Care Explor. 2021 Jun 15;3(6):e0431. doi: 10.1097/CCE.0000000000000431 (PMC8208445; doi:10.1097/cce.0000000000000431), 2021-06-15

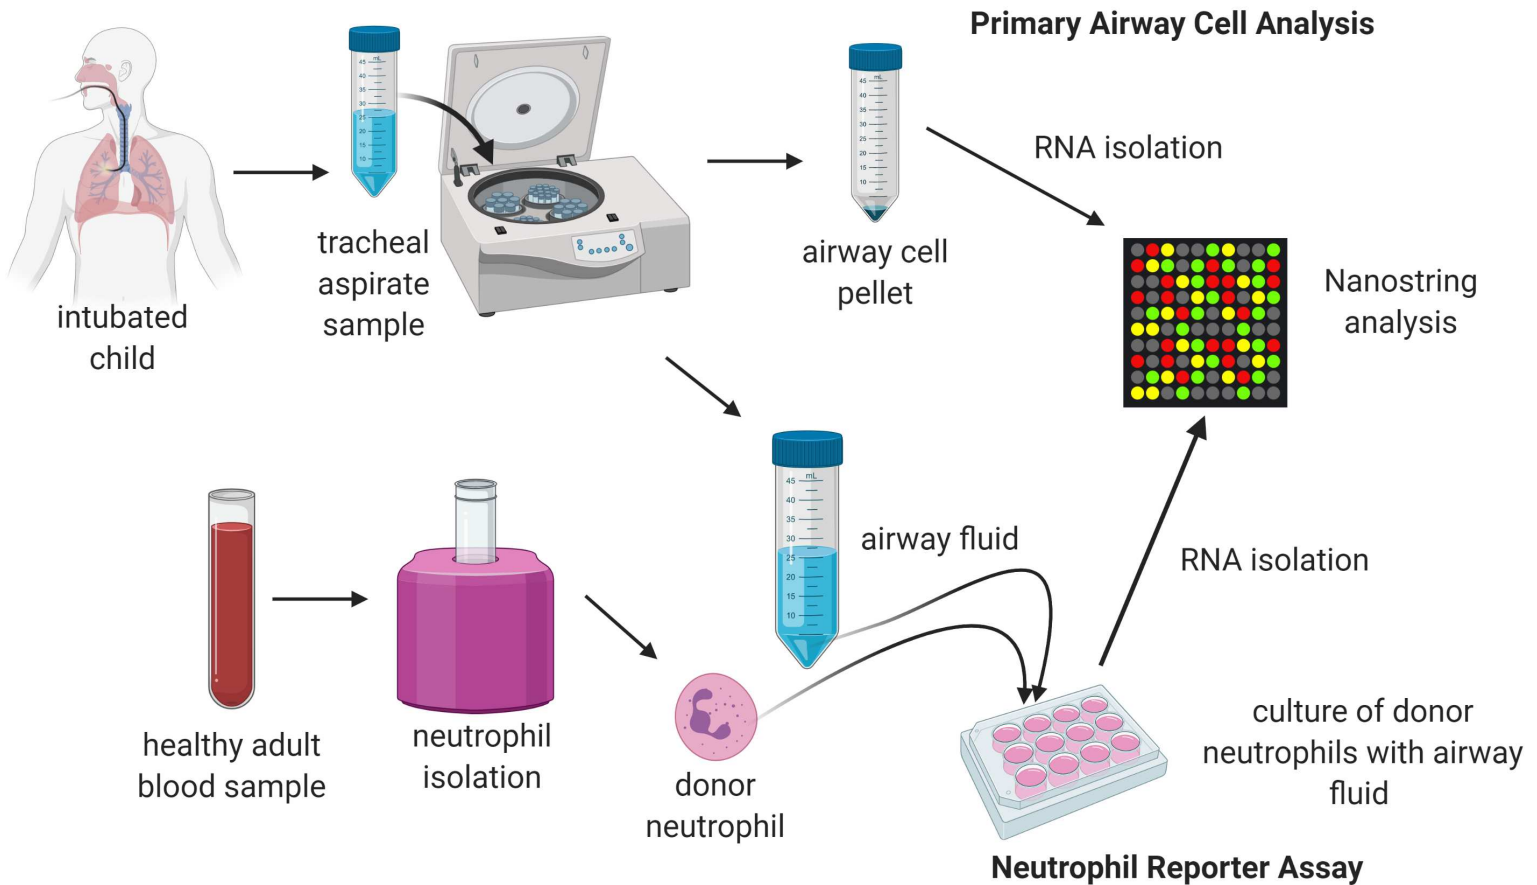

# Modeling Process

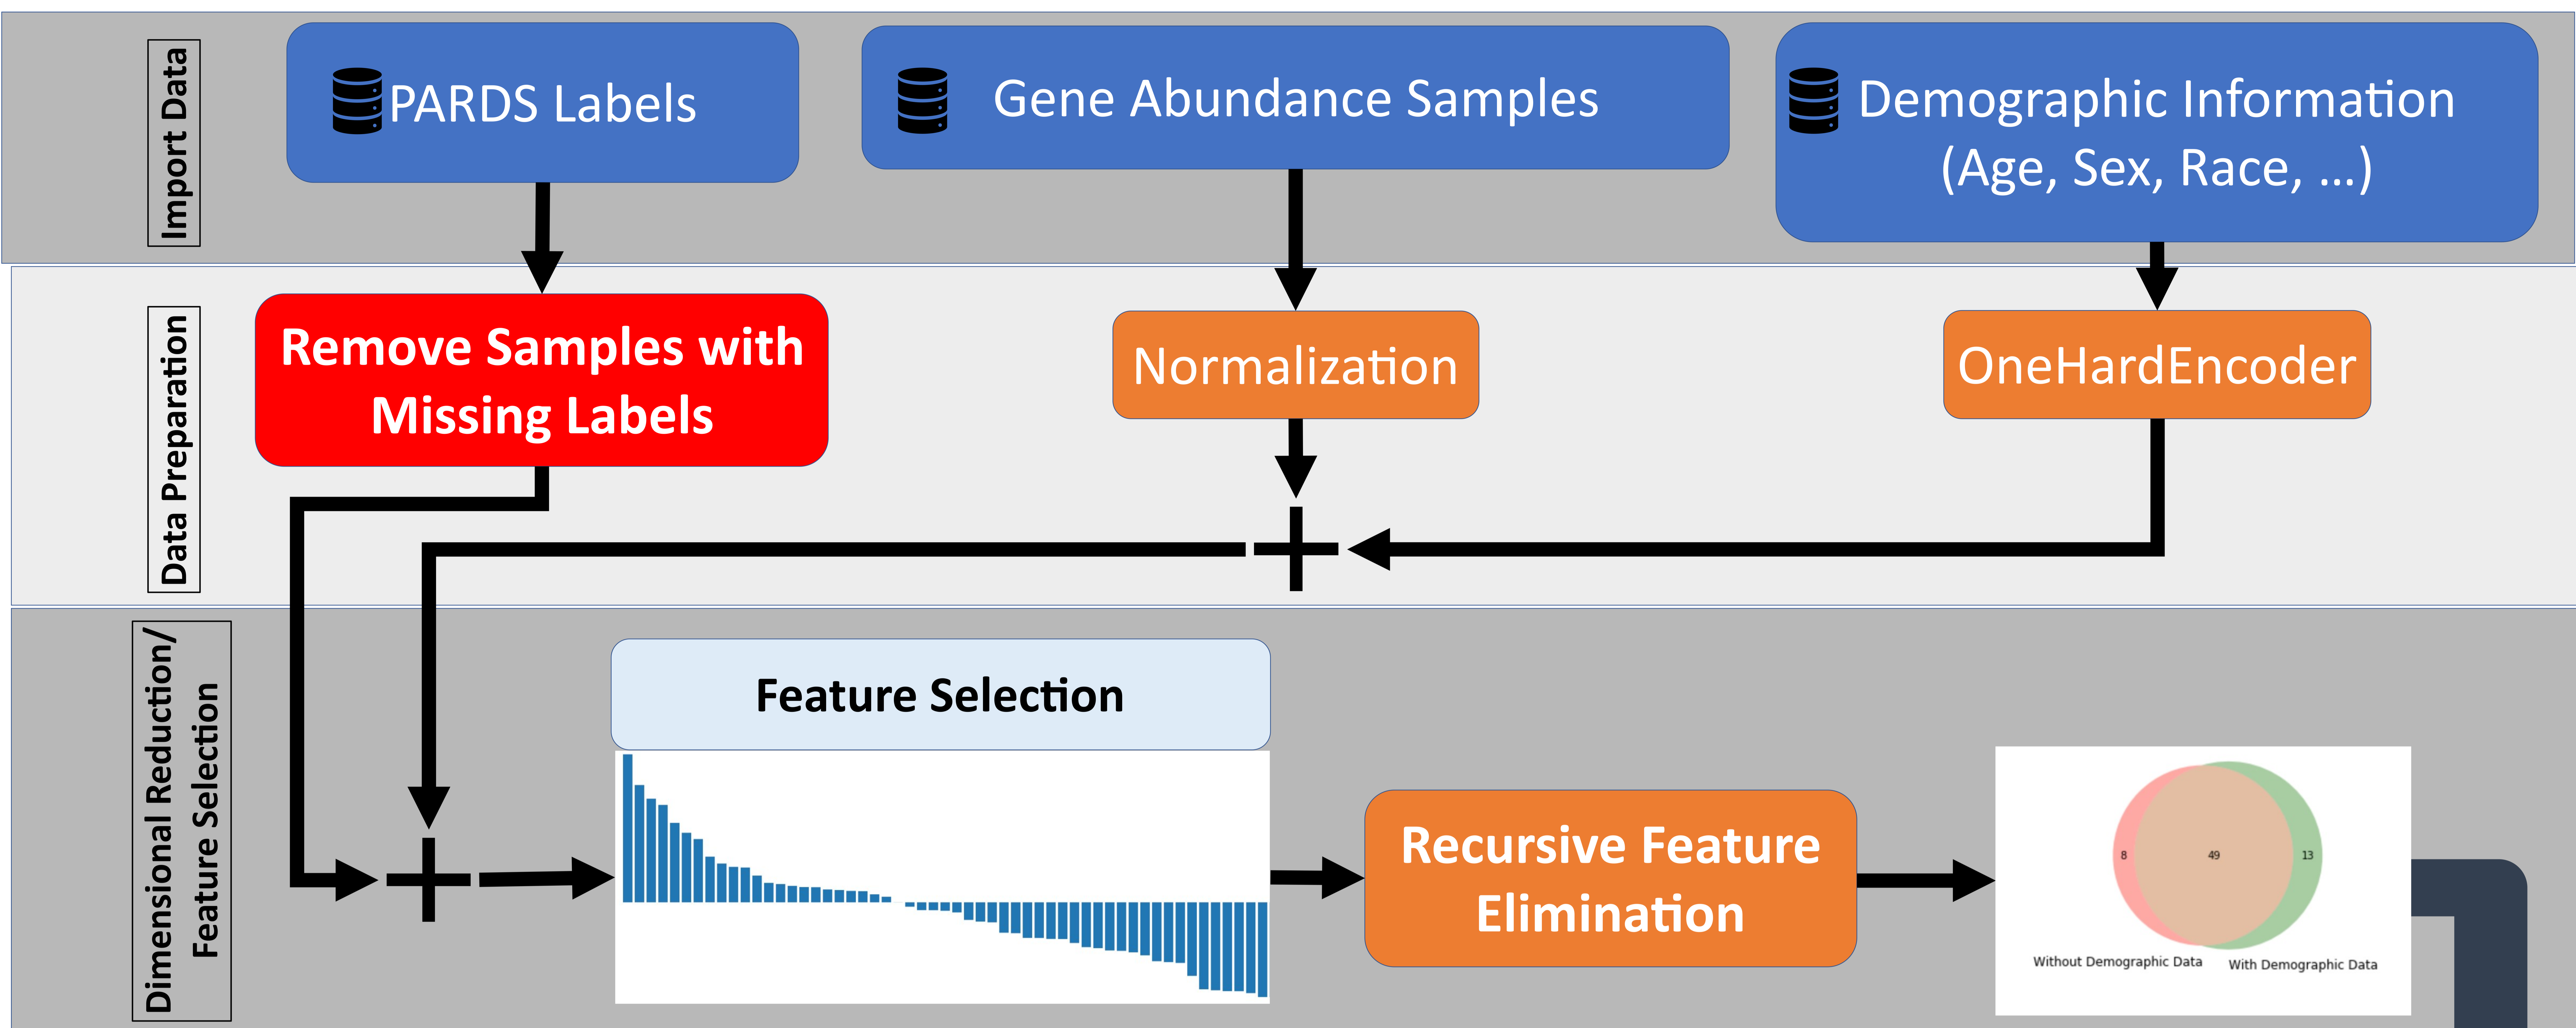

## Outputs

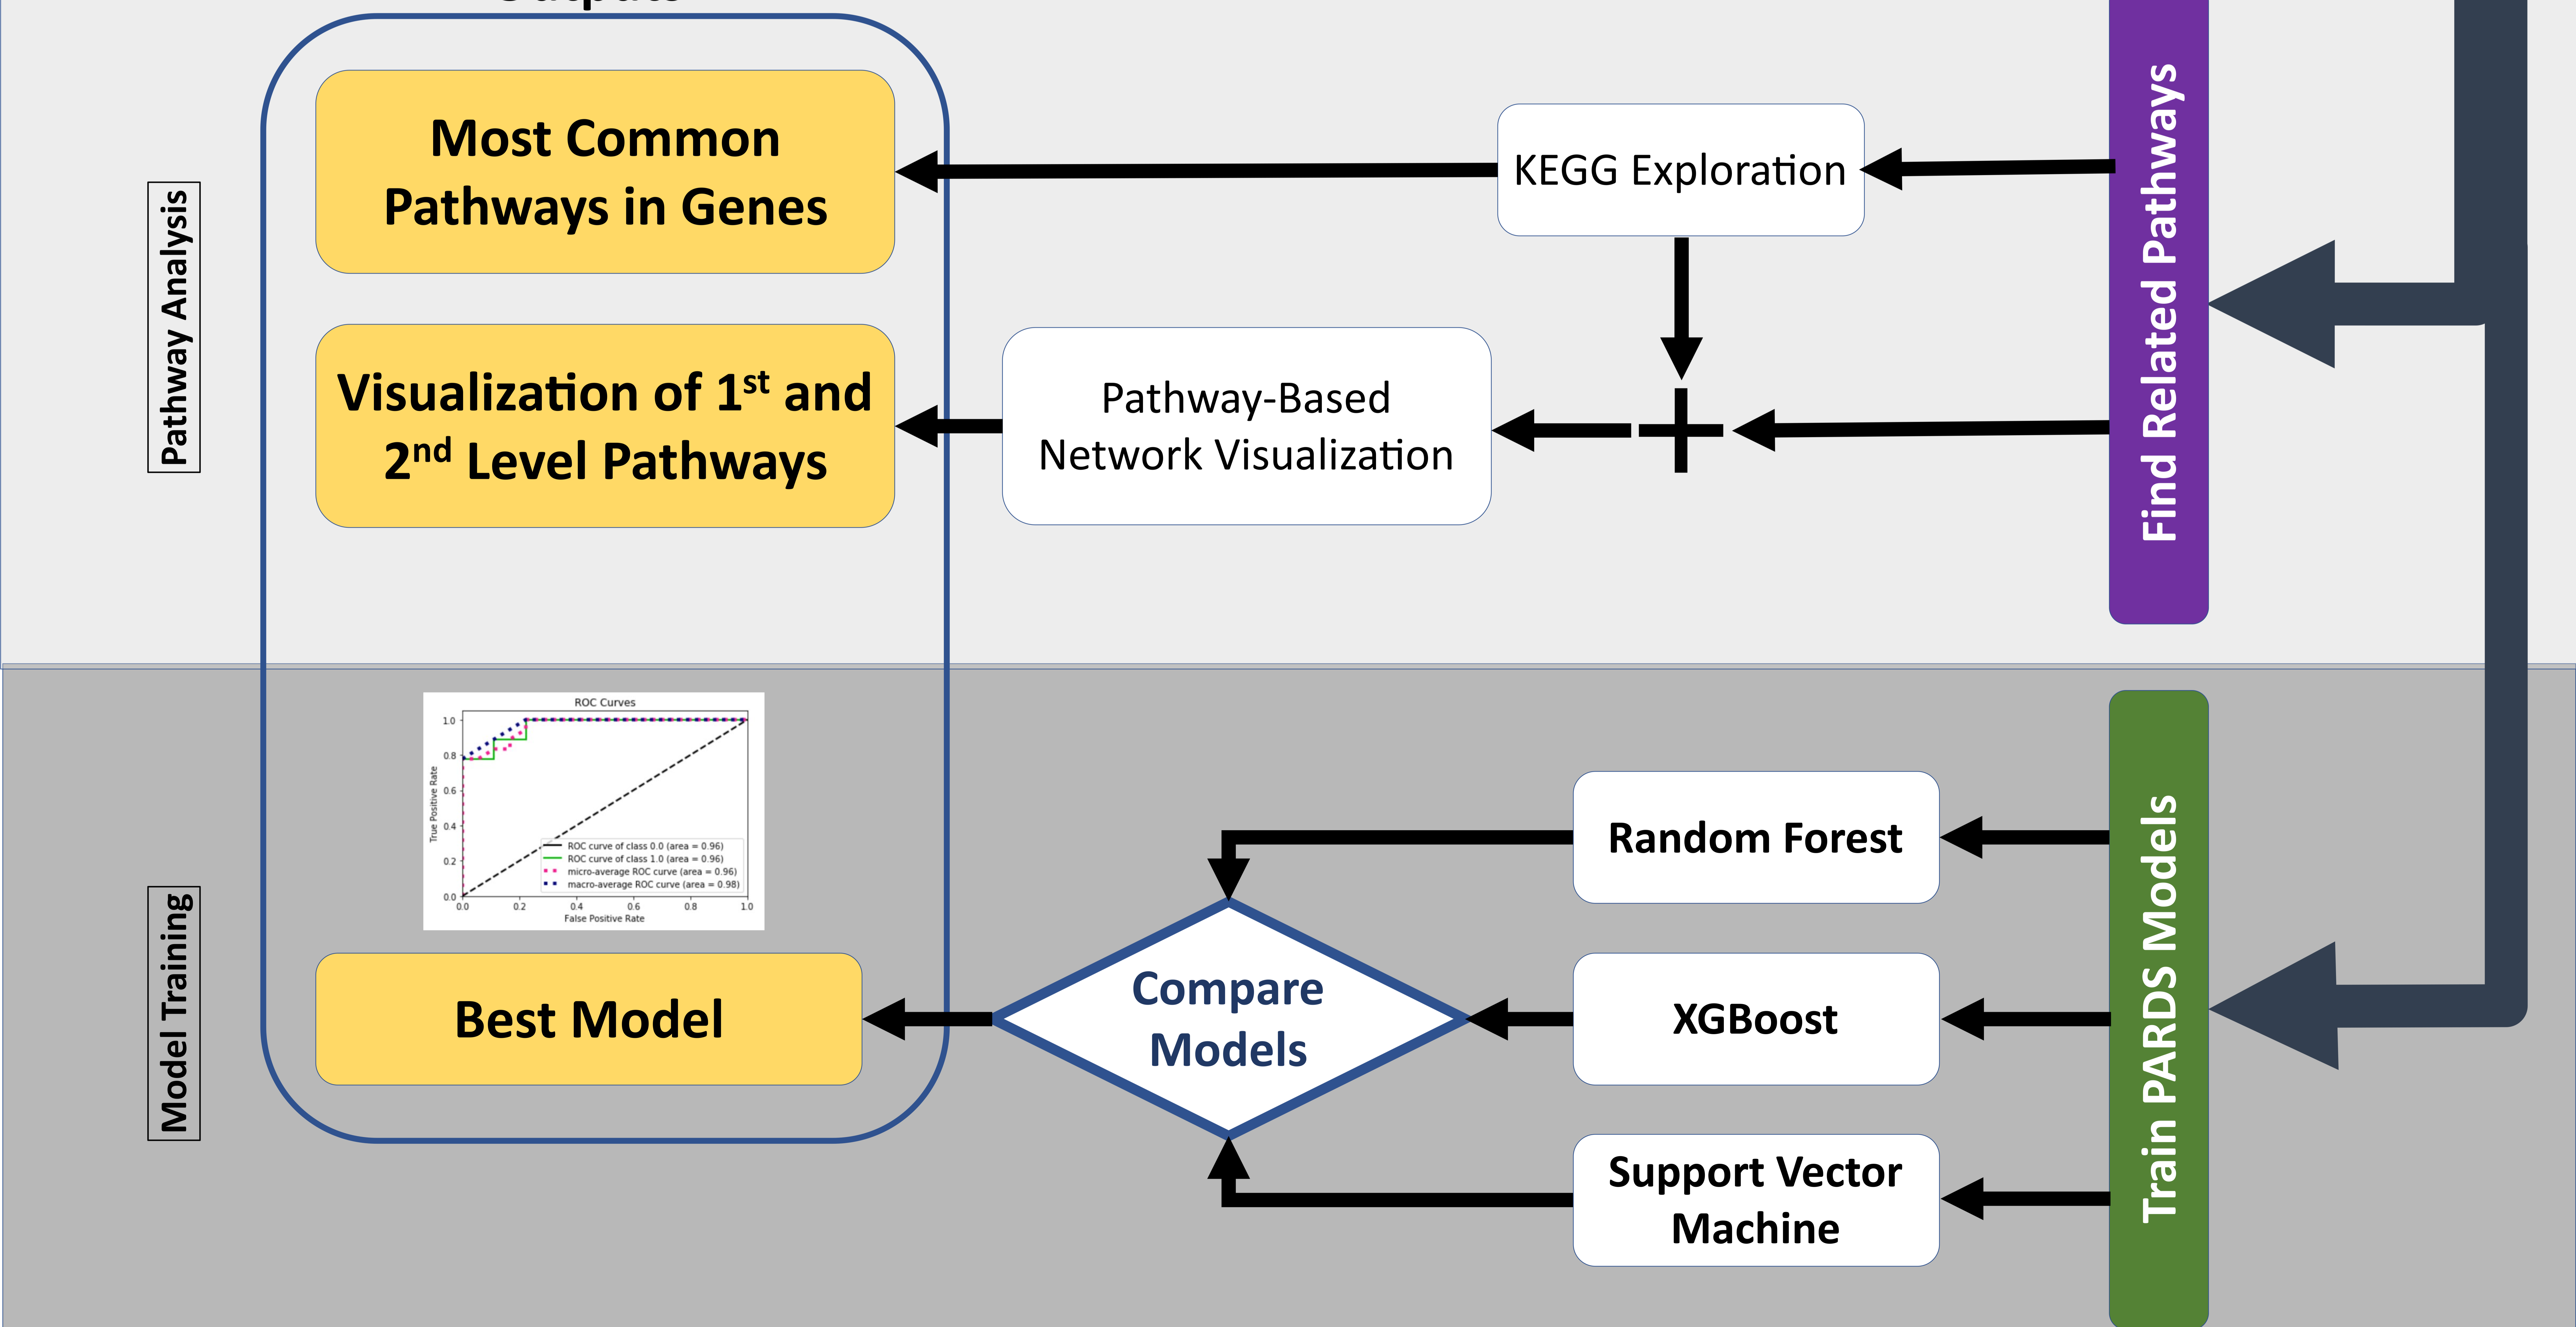



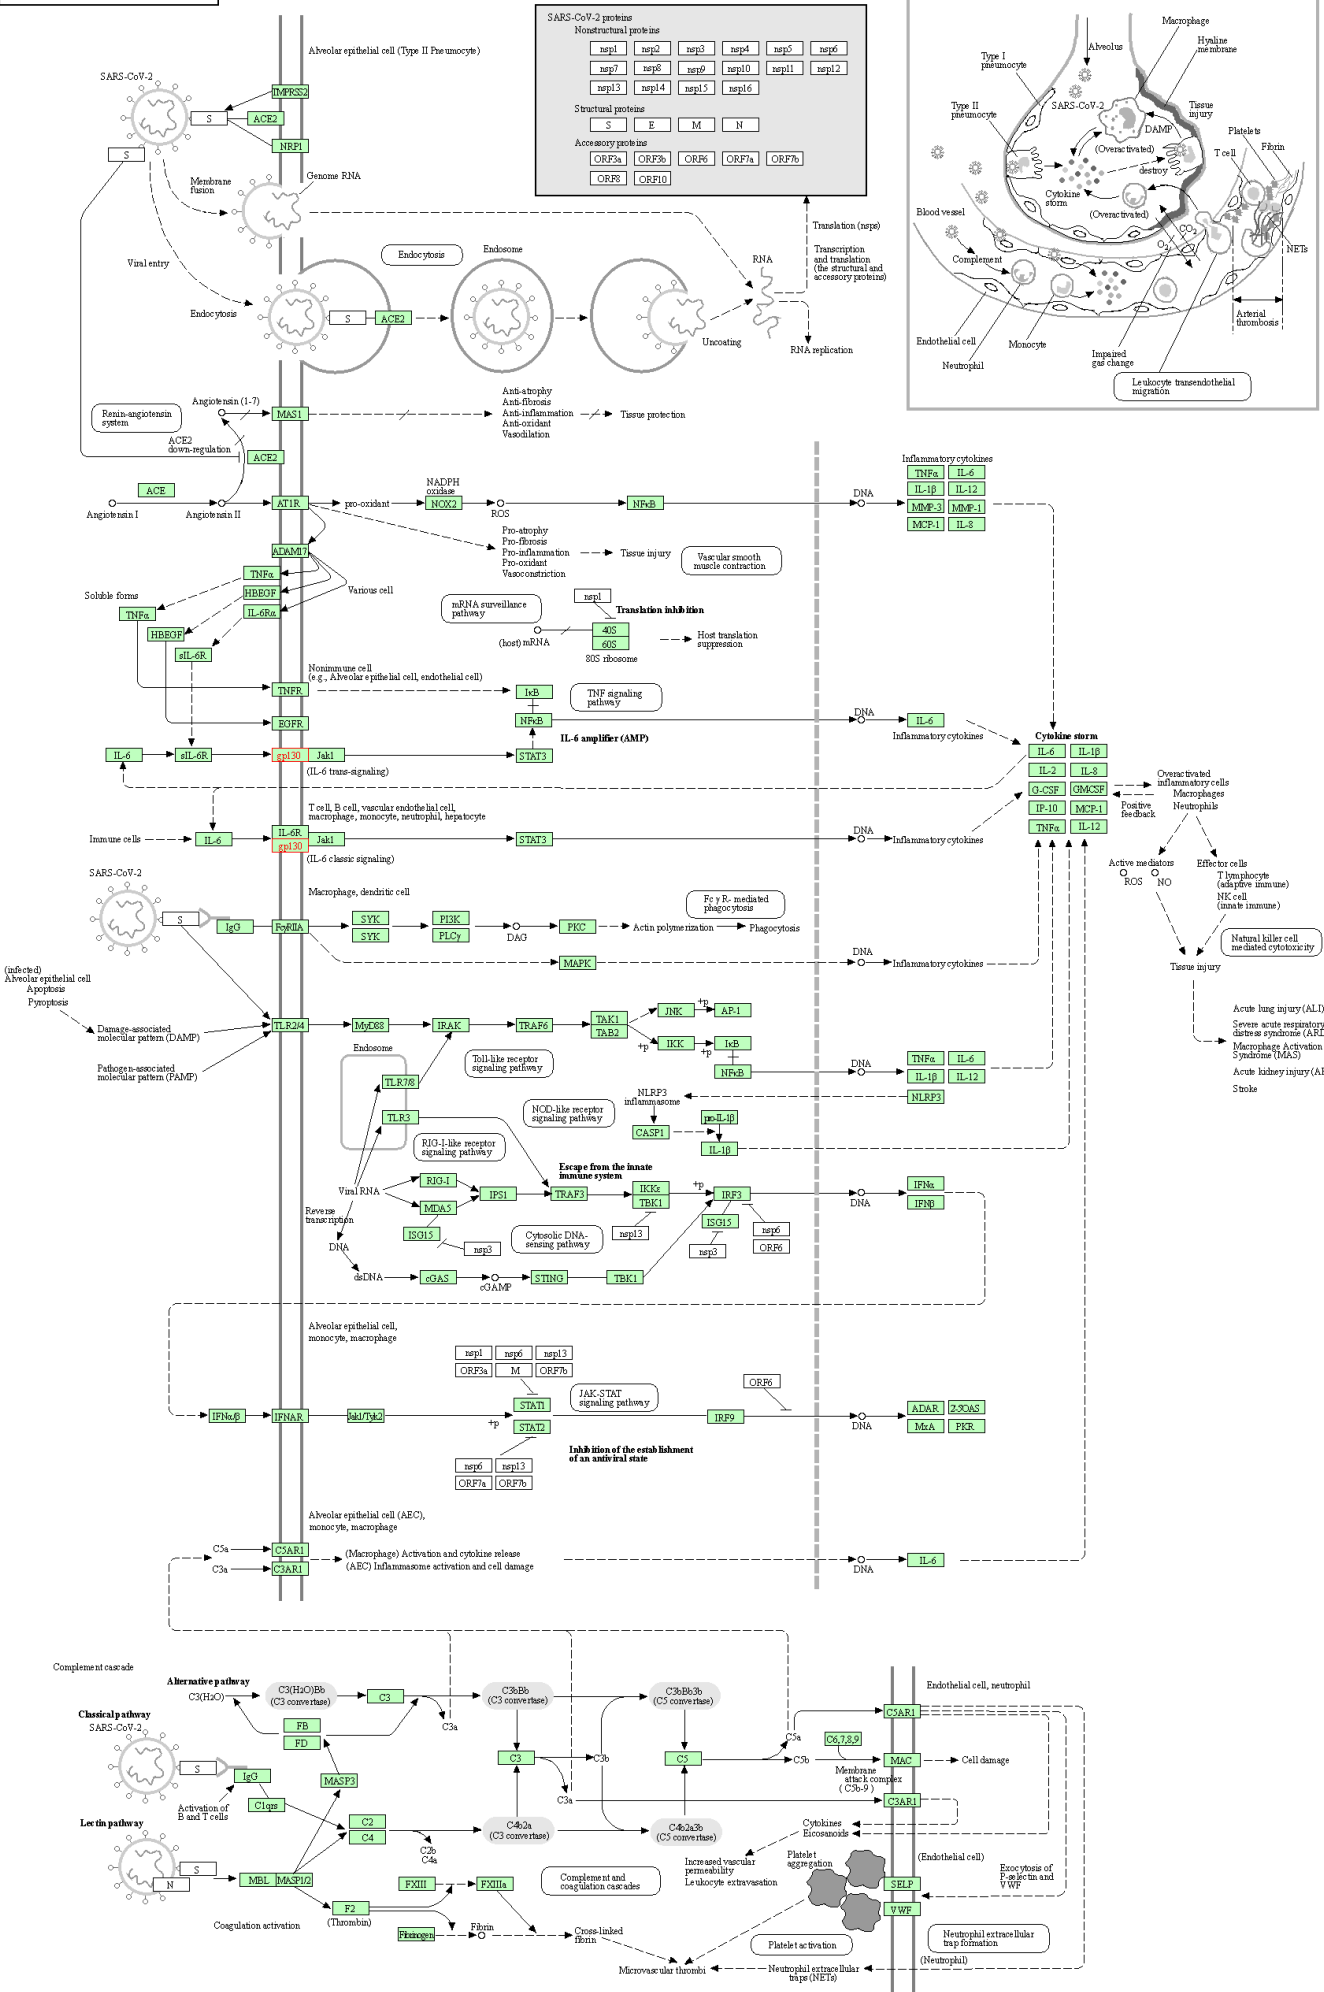



**A.**

|           |       |
|-----------|-------|
| NTSE      | 1.31  |
| IL29      | 1.03  |
| BST2      | 0.91  |
| BATF3     | 0.86  |
| IL2       | 0.70  |
| TIGIT     | 0.61  |
| CASP1     | 0.56  |
| AIRE      | 0.40  |
| NEG_D     | 0.34  |
| CTLA4-TM  | 0.31  |
| SIGIRR    | 0.31  |
| CXCL12    | 0.24  |
| IL28A/B   | 0.17  |
| CX3CL1    | 0.16  |
| IRF8      | 0.15  |
| ITGA6     | 0.14  |
| IL22      | 0.13  |
| VCAM1     | 0.11  |
| IL22RA2   | 0.11  |
| CCL26     | 0.10  |
| KIR3DL2   | 0.10  |
| IFNA2     | 0.07  |
| IL5       | 0.05  |
| B3GAT1    | 0.00  |
| IL26      | -0.04 |
| GZMA      | -0.07 |
| KIR3DL3   | -0.07 |
| KLRC2     | -0.07 |
| CD209     | -0.09 |
| IL10      | -0.15 |
| PAX5      | -0.17 |
| CCL13     | -0.18 |
| PDGFB     | -0.27 |
| CCR8      | -0.27 |
| IL17B     | -0.31 |
| NOS2      | -0.31 |
| CD276     | -0.32 |
| EDNRB     | -0.32 |
| CCBP2     | -0.36 |
| CD70      | -0.39 |
| ADA       | -0.40 |
| CFD       | -0.42 |
| CXCL11    | -0.43 |
| IFNB1     | -0.44 |
| CXCL9     | -0.47 |
| ITGA2B    | -0.52 |
| CD8B      | -0.53 |
| CD19      | -0.53 |
| sCTLA4    | -0.65 |
| EOMES     | -0.77 |
| CD5       | -0.77 |
| CTLA4_all | -0.78 |
| IKBKAP    | -0.78 |
| FAS       | -0.80 |
| KLRG1     | -0.83 |
| CFH       | -0.84 |
| CCRL1     | -0.97 |
| CCL16     | -1.00 |
| C4BPA     | -1.00 |
| CD6       | -1.10 |
| CCL7      | -1.12 |
| CD3EAP    | -1.14 |
| NEG_G     | -1.19 |
| CCL24     | -1.35 |
| IL21      | -1.61 |
| CCL22     | -1.66 |
| CXCL10    | -1.74 |
| THY1      | -2.58 |

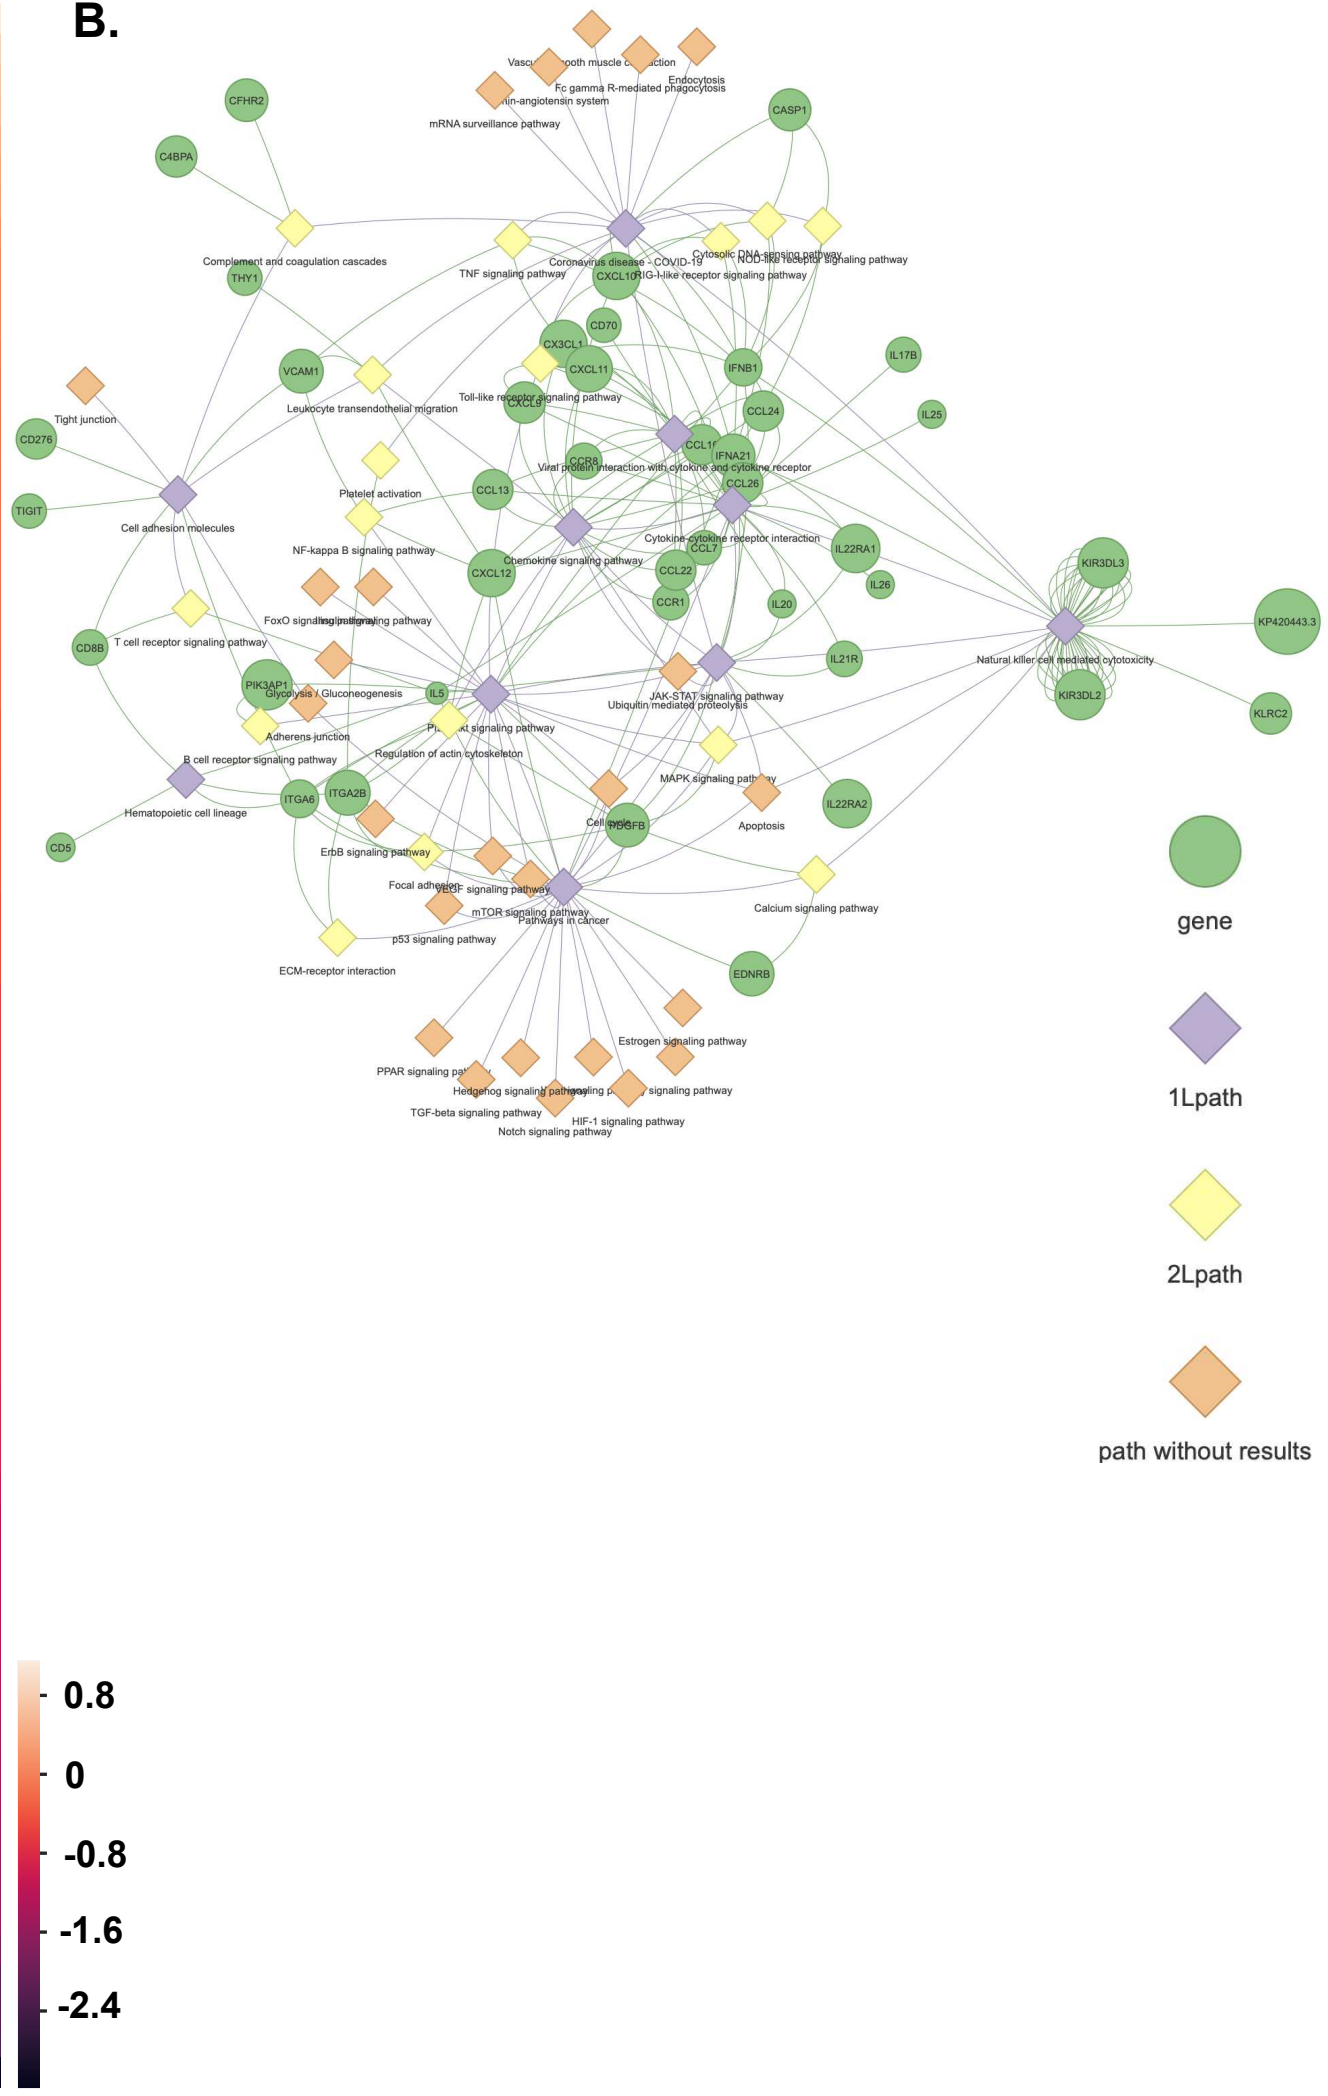

Supplement: cc9-3-e0431-s002.pdf [file cc9-3-e0431-s002.pdf]
